# Supplementary material for: Global economic trade-offs between wild nature and tropical agriculture
Source: PLoS Biol. 2017 Jul 21;15(7):e2001657. doi: 10.1371/journal.pbio.2001657 (PMC5521733; doi:10.1371/journal.pbio.2001657)
Supplement: S1 Data — (XLSX) [file pbio.2001657.s023.xlsx]

## Sheet: S1_Data
Reference	service	service2	country	protectedStatus	continent	method	method2	serviceArea	source	yearOfPubl	value	LAT	LONG	peer_review	PAsIUCNcat	glc2000	CO2_TOTAL	Pop2005	soilUnit	accessibility	AveTemp80_08	AvePrecip_80_08	amphibrich	mammrich	birdrich	krigVascularPlantRichness	coKrigVascularPlantRichness	combVascul	elevation	temperature	rainfall	population	spatial GDP
[1]	food	provision	Indonesia	Protected	Asia	Directmarketpricing	revealed_preference	2500000	vanBeukering2003	2003	17.556	3.5	97.5	yes	1	1	379.894	5.15531e+06	83	2662	27.2	2059.5	11	142	251	2813	2823	2322	1218.78	16.9876	2458.49	14889.9	0.939645
[1]	soil_retention	regulative	Indonesia	Protected	Asia	AvoidedCost	cost_based	2500000	vanBeukering2003	2003	1197	3.5	97.5	yes	1	1	379.894	5.15531e+06	83	2662	27.2	2059.5	11	142	251	2813	2823	2322	1218.78	16.9876	2458.49	25420.9	0.939645
[1]	food	provision	Indonesia	Protected	Asia	Directmarketpricing	revealed_preference	2500000	vanBeukering2003	2003	31.3867	3.5	97.5	yes	1	1	379.894	5.15531e+06	83	2662	27.2	2059.5	11	142	251	2813	2823	2322	1218.78	16.9876	2458.49	25420.9	0.939645
[25]	raw_materials	provision	India	Partiallyprotected	Asia	Directmarketpricing	revealed_preference	1434600	Verma2000	2000	55.5142	32.1024	77.5619	no	1	19	18.939	1051.25	2	2674	-1.8	315.7	7	49	166	1202	1517	1618	4731.4	4.44066	1609.14	25420.9	0.304683
[25]	raw_materials	provision	India	Partiallyprotected	Asia	Directmarketpricing	revealed_preference	1434600	Verma2000	2000	12.1429	32.1024	77.5619	no	1	19	18.939	1051.25	2	2674	-1.8	315.7	7	49	166	1202	1517	1618	4731.4	4.44066	1609.14	25420.9	0.304683
[25]	raw_materials	provision	India	Partiallyprotected	Asia	Directmarketpricing	revealed_preference	3698600	Verma2000	2000	53.7719	32.1024	77.5619	no	1	19	18.939	1051.25	2	2674	-1.8	315.7	7	49	166	1202	1517	1618	4731.4	4.44066	1609.14	17556	0.304683
[25]	food	provision	India	Partiallyprotected	Asia	Directmarketpricing	revealed_preference	1434600	Verma2000	2000	4.921	32.1024	77.5619	no	1	19	18.939	1051.25	2	2674	-1.8	315.7	7	49	166	1202	1517	1618	4731.4	4.44066	1609.14	17556	0.304683
[2]	food	provision	LaoPeoplesDemocraticRepublic	Partiallyprotected	Asia	Directmarketpricing	revealed_preference	505700	Rosales2005	2005	11.625	15.5767	107.007	no	0	1	230.173	8363.4	11	568	23.7	2928.1	33	132	343	3415	3803	1879	898.457	21.4478	2491.01	17556	0.0795812
[2]	raw_materials	provision	LaoPeoplesDemocraticRepublic	Partiallyprotected	Asia	Directmarketpricing	revealed_preference	505700	Rosales2005	2005	13.125	15.5767	107.007	no	0	1	230.173	8363.4	11	568	23.7	2928.1	33	132	343	3415	3803	1879	898.457	21.4478	2491.01	17556	0.0795812
[2]	disturbance_regulation	regulative	LaoPeoplesDemocraticRepublic	Partiallyprotected	Asia	AvoidedCost	cost_based	288150	Rosales2005	2005	115.375	15.5767	107.007	no	0	1	230.173	8363.4	11	568	23.7	2928.1	33	132	343	3415	3803	1879	898.457	21.4478	2491.01	15048.5	0.0795812
[2]	soil_retention	regulative	LaoPeoplesDemocraticRepublic	Partiallyprotected	Asia	AvoidedCost	cost_based	288150	Rosales2005	2005	3.7125	15.5767	107.007	no	0	1	230.173	8363.4	11	568	23.7	2928.1	33	132	343	3415	3803	1879	898.457	21.4478	2491.01	15048.5	0.0795812
[2]	food	provision	LaoPeoplesDemocraticRepublic	Partiallyprotected	Asia	GroupValuation	revealed_preference	505700	Rosales2005	2005	16	15.5767	107.007	no	0	1	230.173	8363.4	11	568	23.7	2928.1	33	132	343	3415	3803	1879	898.457	21.4478	2491.01	15048.5	0.0795812
[1]	raw_materials	provision	Indonesia	Protected	Asia	Directmarketpricing	revealed_preference	2500000	vanBeukering2003	2003	31.987	3.5	97.5	yes	1	1	379.894	5.15531e+06	83	2662	27.2	2059.5	11	142	251	2813	2823	2322	1218.78	16.9876	2458.49	37328	0.939645
[3]	food	provision	BoliviaPlurinationalStateof	Notprotected	LatinAmericaandtheCaribbean	Directmarketpricing	revealed_preference	0	Godoy2002	2002	9.798	-21.6167	-64.4333	yes	5	14	229.758	81042.7	102	766	22.2	833.4	14	81	254	1977	2336	2376	2002.56	20.1203	745.477	11451.7	0.828922
[3]	food	provision	Honduras	Notprotected	LatinAmericaandtheCaribbean	Directmarketpricing	revealed_preference	0	Godoy2002	2002	10.764	14.3824	-87.6179	yes	0	1	139.618	1.61794e+06	22	8	23.2	1295.3	17	132	197	3984	4093	2857	1038.22	24.0093	1327.86	11451.7	4.25889
[26]	food	provision	Nepal	Partiallyprotected	Asia	Directmarketpricing	revealed_preference	192600	Regmi2003	2003	0.102671	27.9229	84.8568	no	0	16	123.809	15870	2	84	-5.6	829.1	13	89	352	2929	2656	1929	425.176	22.0679	1758.53	11451.7	0.86957
[30]	water_regulation	regulative	Mexico	Partiallyprotected	LatinAmericaandtheCaribbean	PES	revealed_preference	1823640	PerrotMatre2001	2001	29.211	19	-99	no	4	4	220.587	8.44534e+06	184	139	12.8	906	18	98	165	3137	3714	1969	1432.64	21.5751	921.382	8550.92	12.9744
[4]	soil_retention	regulative	Guatemala	Protected	LatinAmericaandtheCaribbean	TotalEconomicValue	revealed_preference	6500	Ammour2000	2000	39.9	16.0231	-89.3046	no	0	1	435.357	58105.9	12	333	23.8	2806.7	19	126	264	3276	3431	2566	324.444	24.0429	2402.79	8550.92	0.0772443
[5]	food	provision	Cambodia	Notprotected	Asia	Directmarketpricing	revealed_preference	1813	Bann1997	1997	279.59	12.6426	105.285	no	0	9	128.918	5567.55	12	199	26.7	1840.4	23	91	256	3309	3451	1935	50.255	27.4713	1617.63	8550.92	0.794537
[5]	raw_materials	provision	Cambodia	Notprotected	Asia	Directmarketpricing	revealed_preference	1813	Bann1997	1997	35.04	12.6426	105.285	no	0	9	128.918	5567.55	12	199	26.7	1840.4	23	91	256	3309	3451	1935	50.255	27.4713	1617.63	8550.92	0.794537
[5]	raw_materials	provision	Cambodia	Notprotected	Asia	Directmarketpricing	revealed_preference	1813	Bann1997	1997	178.12	12.6426	105.285	no	0	9	128.918	5567.55	12	199	26.7	1840.4	23	91	256	3309	3451	1935	50.255	27.4713	1617.63	18153.3	0.794537
[6]	food	provision	Australia	Protected	Oceania	Directmarketpricing	revealed_preference	894400	Curtis2004	2004	5.07944	-17.728	145.498	yes	0	1	192.396	72410.1	122	192	23.8	1986.4	42	74	277	2487	2188	1046	586.91	21.5193	1605.89	21004	2.15282
[6]	genetic_resources	provision	Australia	Protected	Oceania	Directmarketpricing	revealed_preference	894400	Curtis2004	2004	15.4411	-17.728	145.498	yes	0	1	192.396	72410.1	122	192	23.8	1986.4	42	74	277	2487	2188	1046	586.91	21.5193	1605.89	21004	2.15282
[6]	water_supply	provision	Australia	Protected	Oceania	Directmarketpricing	revealed_preference	894400	Curtis2004	2004	9.1493	-17.728	145.498	yes	0	1	192.396	72410.1	122	192	23.8	1986.4	42	74	277	2487	2188	1046	586.91	21.5193	1605.89	5577.03	2.15282
[6]	climate_regulation	regulative	Australia	Protected	Oceania	Directmarketpricing	revealed_preference	894400	Curtis2004	2004	14.5983	-17.728	145.498	yes	0	1	192.396	72410.1	122	192	23.8	1986.4	42	74	277	2487	2188	1046	586.91	21.5193	1605.89	5577.03	2.15282
[6]	climate_regulation	regulative	Australia	Protected	Oceania	Directmarketpricing	revealed_preference	894400	Curtis2004	2004	14.382	-17.728	145.498	yes	0	1	192.396	72410.1	122	192	23.8	1986.4	42	74	277	2487	2188	1046	586.91	21.5193	1605.89	5577.03	2.15282
[6]	water_regulation	regulative	Australia	Protected	Oceania	Directmarketpricing	revealed_preference	894400	Curtis2004	2004	2.32563	-17.728	145.498	yes	0	1	192.396	72410.1	122	192	23.8	1986.4	42	74	277	2487	2188	1046	586.91	21.5193	1605.89	5577.03	2.15282
[6]	soil_retention	regulative	Australia	Protected	Oceania	Directmarketpricing	revealed_preference	894400	Curtis2004	2004	15.4411	-17.728	145.498	yes	0	1	192.396	72410.1	122	192	23.8	1986.4	42	74	277	2487	2188	1046	586.91	21.5193	1605.89	5577.03	2.15282
[6]	biocontrol	regulative	Australia	Protected	Oceania	Directmarketpricing	revealed_preference	894400	Curtis2004	2004	13.3724	-17.728	145.498	yes	0	1	192.396	72410.1	122	192	23.8	1986.4	42	74	277	2487	2188	1046	586.91	21.5193	1605.89	223307	2.15282
[6]	disturbance_regulation	regulative	Australia	Protected	Oceania	Directmarketpricing	revealed_preference	894400	Curtis2004	2004	11.6372	-17.728	145.498	yes	0	1	192.396	72410.1	122	192	23.8	1986.4	42	74	277	2487	2188	1046	586.91	21.5193	1605.89	8991	2.15282
[6]	recreation	cultural	Australia	Protected	Oceania	Directmarketpricing	revealed_preference	894400	Curtis2004	2004	5.31831	-17.728	145.498	yes	0	1	192.396	72410.1	122	192	23.8	1986.4	42	74	277	2487	2188	1046	586.91	21.5193	1605.89	207	2.15282
[6]	raw_materials	provision	Australia	Protected	Oceania	Directmarketpricing	revealed_preference	894400	Curtis2004	2004	6.13859	-17.728	145.498	yes	0	1	192.396	72410.1	122	192	23.8	1986.4	42	74	277	2487	2188	1046	586.91	21.5193	1605.89	2353	2.15282
[6]	genetic_resources	provision	Australia	Protected	Oceania	Directmarketpricing	revealed_preference	894400	Curtis2004	2004	20.9442	-17.728	145.498	yes	0	1	192.396	72410.1	122	192	23.8	1986.4	42	74	277	2487	2188	1046	586.91	21.5193	1605.89	550	2.15282
[6]	genetic_resources	provision	Australia	Protected	Oceania	Directmarketpricing	revealed_preference	894400	Curtis2004	2004	6.98141	-17.728	145.498	yes	0	1	192.396	72410.1	122	192	23.8	1986.4	42	74	277	2487	2188	1046	586.91	21.5193	1605.89	1044.62	2.15282
[7]	raw_materials	provision	Uganda	Partiallyprotected	Africa	Directmarketpricing	revealed_preference	5000000	Emerton1999	1999	59.1417	1	32	no	0	2	225.919	620133	51	273	23.7	1257.7	28	144	391	2408	2033	1664	1145.72	21.9919	1290.98	823	3.04802
[7]	food	provision	Uganda	Partiallyprotected	Africa	Directmarketpricing	revealed_preference	5000000	Emerton1999	1999	28.4395	1	32	no	0	2	225.919	620133	51	273	23.7	1257.7	28	144	391	2408	2033	1664	1145.72	21.9919	1290.98	1044.62	3.04802
[7]	climate_regulation	regulative	Uganda	Partiallyprotected	Africa	Directmarketpricing	revealed_preference	11449110	Emerton1999	1999	13.0561	1	32	no	0	2	225.919	620133	51	273	23.7	1257.7	28	144	391	2408	2033	1664	1145.72	21.9919	1290.98	1044.62	3.04802
[7]	soil_retention	regulative	Uganda	Partiallyprotected	Africa	ReplacementCost	cost_based	1272699	Emerton1999	1999	249.103	1	32	no	0	2	225.919	620133	51	273	23.7	1257.7	28	144	391	2408	2033	1664	1145.72	21.9919	1290.98	18162.3	3.04802
[27]	NTFPs	provision	India	Protected	Asia	ContingentValuation	stated_preference	41655100	Gundimeda2006	2006	6552.96	20	78	no	0	12	67.464	2.45283e+06	192	142	27.4	1163.6	14	62	182	995	974	918	348.588	27.3427	1096.42	2887.91	5.08416
[27]	recreation	cultural	India	Protected	Asia	Directmarketpricing	revealed_preference	15679600	Gundimeda2006	2006	119.905	20	78	no	0	12	67.464	2.45283e+06	192	142	27.4	1163.6	14	62	182	995	974	918	348.588	27.3427	1096.42	2887.91	5.08416
[8]	soil_retention	regulative	Philippines	Notprotected	Asia	Directmarketpricing	cost_based	12000	Hodgson1988	1988	519.92	11.2495	119.431	no	3	1	0	78211.3	0	492	27.8	2971.5	8	56	161	2782	3238	2208	88.5029	0	0	2887.91	0.12342
[28]	genetic_resources	provision	Australia	Partiallyprotected	Oceania	ContingentValuation	stated_preference	21000	Mallawaarachchi2001	2001	18.3913	-19.7061	145.774	yes	0	12	88.537	158716	171	230	22.4	729.7	18	48	213	1895	1764	847	436.866	22.7042	608.505	2887.91	0.0185943
[17]	recreation	cultural	Uganda	Partiallyprotected	Africa	ContingentValuation	stated_preference	30000	Naidoo2005	2005	1.2675	1	32	yes	0	2	225.919	620133	51	273	23.7	1257.7	28	144	391	2408	2033	1664	1145.72	21.9919	1290.98	2887.91	4.13006
[10]	recreation	cultural	CostaRica	Protected	Americas	ContingentValuation	stated_preference	10000	Echeverria1995	1995	390.363	18.192	-77.614	yes	0	6	154.978	1.00623e+06	122	125	26.8	1208	11	22	103	2469	2838	1815	381.019	23.5806	1747.98	2887.91	6.36276
[11]	recreation	cultural	Ecuador	Protected	LatinAmericaandtheCaribbean	HedonicPricing	revealed_preference	0	Edwards1991	1991	1025.51	-0.541406	-91.017	yes	1	14	0	12772.9	0	2101	24	680.7	0	1	53	1808	2242	1665	351.944	21.1113	506.114	2887.91	0.00414819
[12]	food	provision	Peru	Partiallyprotected	LatinAmericaandtheCaribbean	Directmarketpricing	revealed_preference	0	Godoy1993	1993	52.5613	-9.18333	-75	yes	0	17	419.663	184611	52	504	27.5	1790	70	174	477	3737	3746	3728	420.138	27.7553	2058.86	2887.91	0.0448511
[12]	raw_materials	provision	Brazil	Partiallyprotected	LatinAmericaandtheCaribbean	Directmarketpricing	revealed_preference	0	Godoy1993	1993	331.931	-14	-51	yes	0	13	125.484	28873.4	51	793	24.3	1699.7	45	133	368	3444	3178	1649	299.979	25.1262	1604.11	2887.91	0.180254
[12]	raw_materials	provision	India	Partiallyprotected	Asia	Directmarketpricing	revealed_preference	0	Godoy1993	1993	1565.61	20	78	yes	0	12	67.464	2.45283e+06	192	142	27.4	1163.6	14	62	182	995	974	918	348.588	27.3427	1096.42	2887.91	1.99523
[12]	raw_materials	provision	Indonesia	Partiallyprotected	Asia	Directmarketpricing	revealed_preference	0	Godoy1993	1993	179.534	0	113	yes	3	1	394.646	20604.4	11	1982	23.4	3878.7	8	123	252	5089	4751	2678	324.348	25.4305	3100.16	2887.91	0.104365
[12]	raw_materials	provision	Mexico	Partiallyprotected	LatinAmericaandtheCaribbean	Directmarketpricing	revealed_preference	0	Godoy1993	1993	149.614	19	-99	yes	4	4	220.587	8.44534e+06	184	139	12.8	906	18	98	165	3137	3714	1969	1432.64	21.5751	921.382	2887.91	9.19178
[12]	raw_materials	provision	SriLanka	Partiallyprotected	Asia	ContingentValuation	stated_preference	0	Godoy1993	1993	154.213	7	80	yes	0	16	0	4.87687e+06	102	22	27.5	1836.4	17	56	184	2309	2403	1979	359.011	25.0515	2838.87	2887.91	10.4585
[12]	genetic_resources	provision	Belize	Partiallyprotected	LatinAmericaandtheCaribbean	Directmarketpricing	revealed_preference	0	Godoy1993	1993	173.761	17.25	-88.7667	yes	0	1	448.027	2559.6	63	39	26.5	1506.2	20	107	271	2738	2813	2612	74.6799	26.2483	1856.49	2887.91	0.030974
[13]	climate_regulation	regulative	Malaysia	Partiallyprotected	Asia	AvoidedCost	cost_based	72816	Kumari1996	1996	403.435	4	101	no	0	1	263.529	1.08668e+06	11	8	27	2836.1	22	147	289	2733	3069	2716	237.648	25.1084	2748.67	2887.91	56.29
[13]	water_regulation	regulative	Malaysia	Partiallyprotected	Asia	FactorIncomeProductionFunction	revealed_preference	72816	Kumari1996	1996	26.2143	4	101	no	0	1	263.529	1.08668e+06	11	8	27	2836.1	22	147	289	2733	3069	2716	237.648	25.1084	2748.67	2887.91	56.29
[13]	water_regulation	regulative	Malaysia	Partiallyprotected	Asia	Directmarketpricing	revealed_preference	72816	Kumari1996	1996	11.826	4	101	no	0	1	263.529	1.08668e+06	11	8	27	2836.1	22	147	289	2733	3069	2716	237.648	25.1084	2748.67	2887.91	56.29
[13]	food	provision	Malaysia	Partiallyprotected	Asia	Directmarketpricing	revealed_preference	72816	Kumari1996	1996	11.4318	4	101	no	0	1	263.529	1.08668e+06	11	8	27	2836.1	22	147	289	2733	3069	2716	237.648	25.1084	2748.67	2887.91	56.29
[13]	recreation	cultural	Malaysia	Partiallyprotected	Asia	Directmarketpricing	revealed_preference	72816	Kumari1996	1996	22.4694	4	101	no	0	1	263.529	1.08668e+06	11	8	27	2836.1	22	147	289	2733	3069	2716	237.648	25.1084	2748.67	2887.91	56.29
[14]	food	provision	Peru	Protected	LatinAmericaandtheCaribbean	Directmarketpricing	revealed_preference	7.9	PinedoVasquez1992	1992	889.739	-4.75	-75.4667	yes	3	7	501.714	45477.8	63	1275	0	2638.8	102	188	508	4741	4158	2150	133.249	27.3006	2152.32	42253.7	0.0440239
[29]	raw_materials	provision	India	Partiallyprotected	Asia	Directmarketpricing	revealed_preference	0	Chomitz1998	1998	2003.82	20	78	no	0	12	67.464	2.45283e+06	192	142	27.4	1163.6	14	62	182	995	974	918	348.588	27.3427	1096.42	14630	2.73438
[16]	climate_regulation	regulative	Malaysia	Partiallyprotected	Asia	Directmarketpricing	revealed_preference	0	Krutilla1991	1991	844.222	4	101	no	0	1	263.529	1.08668e+06	11	8	27	2836.1	22	147	289	2733	3069	2716	237.648	25.1084	2748.67	40299	34.4199
[29]	soil_retention	regulative	Ecuador	Partiallyprotected	LatinAmericaandtheCaribbean	AvoidedCost	cost_based	518600	Chomitz1998	1998	17.3826	-1.26192	-76.8235	no	0	1	474.657	102790	52	1414	25.3	3005.1	118	184	515	4553	3674	2140	263.072	25.8626	3294.76	964	0.0159915
[29]	soil_retention	regulative	Philippines	Partiallyprotected	Asia	AvoidedCost	cost_based	39304	Chomitz1998	1998	236.974	12.335	121.21	no	0	16	0	608469	0	246	27.1	2548.5	6	41	167	2133	2715	2383	414.121	24.8815	2321.21	3624	1.28039
[15]	soil_retention	regulative	Philippines	Partiallyprotected	Asia	FactorIncomeProductionFunction	revealed_preference	0	Dixon1988	1988	1705.6	12.335	121.21	no	0	16	0	608469	0	246	27.1	2548.5	6	41	167	2133	2715	2383	414.121	24.8815	2321.21	3624	1.14279
[16]	recreation	cultural	CostaRica	Partiallyprotected	Americas	TravelCost	revealed_preference	0	Krutilla1991	1991	135.753	9	-83	no	4	1	348.177	34120.4	13	232	24.2	2645.2	48	146	379	7816	6164	3397	611.959	20.2842	3528.29	3624	0.441495
[16]	recreation	cultural	Kenya	Partiallyprotected	Africa	TravelCost	revealed_preference	0	Krutilla1991	1991	232.223	0	37	no	0	13	71.104	1.13673e+06	161	204	26.4	552.2	30	158	438	1819	2127	1914	1488.36	18.6506	1315.12	3624	1.71443
[17]	food	provision	Paraguay	Protected	LatinAmericaandtheCaribbean	RestorationCost	cost_based	280000	Naidoo2006	2006	17	-24.125	-55.475	yes	4	1	181.481	6770.88	51	1311	21.5	1685	37	108	427	2129	2323	1452	255.143	22.0751	1540.21	3624	0
[18]	food	provision	Ecuador	Protected	LatinAmericaandtheCaribbean	Directmarketpricing	revealed_preference	3	Grimes1994	1994	46	-1.06667	-77.6	yes	4	1	414.881	119894	2	327	17.3	1334.8	75	179	548	4022	3780	3541	538.098	25.8167	4142.61	3624	0.334009
[18]	NTFPs	provision	Ecuador	Protected	LatinAmericaandtheCaribbean	Directmarketpricing	revealed_preference	3	Grimes1994	1994	61	-1.06667	-77.6	yes	4	1	414.881	119894	2	327	17.3	1334.8	75	179	548	4022	3780	3541	538.098	25.8167	4142.61	1781.05	0.334009
[18]	genetic_resources	provision	Ecuador	Protected	LatinAmericaandtheCaribbean	Directmarketpricing	revealed_preference	3	Grimes1994	1994	9	-1.06667	-77.6	yes	4	1	414.881	119894	2	327	17.3	1334.8	75	179	548	4022	3780	3541	538.098	25.8167	4142.61	1781.05	0.334009
[19]	water_regulation	regulative	Cameroon	Notprotected	LatinAmericaandtheCaribbean	AvoidedCost	cost_based	195000	Yaron2001	2001	12	4.20472	9.21139	yes	0	16	511.248	1.22308e+06	52	612	22.4	3076.1	78	148	405	3949	4017	3378	365.394	22.5519	2759.64	12.9991	2.55516
[19]	NTFPs	provision	Cameroon	Notprotected	LatinAmericaandtheCaribbean	Directmarketpricing	revealed_preference	195000	Yaron2001	2001	6	4.20472	9.21139	yes	0	16	511.248	1.22308e+06	52	612	22.4	3076.1	78	148	405	3949	4017	3378	365.394	22.5519	2759.64	2506	2.55516
[20]	recreation	cultural	Cameroon	Protected	LatinAmericaandtheCaribbean	ContingentValuation	stated_preference	351000	Ruitenbeek1992	1992	5	5.27806	9.05667	yes	0	1	488.129	1457.61	121	557	22.4	2937.8	68	133	404	3717	3484	2572	513.629	22.7198	2590.17	33433.2	0.00116625
[20]	water_regulation	regulative	Cameroon	Protected	LatinAmericaandtheCaribbean	AvoidedCost	cost_based	351000	Ruitenbeek1992	1992	4	5.27806	9.05667	yes	0	1	488.129	1457.61	121	557	22.4	2937.8	68	133	404	3717	3484	2572	513.629	22.7198	2590.17	33433.2	0.00116625
[21]	food	provision	Indonesia	Notprotected	Asia	Directmarketpricing	revealed_preference	0	Priess2007	2007	55.8757	-1.51667	120.183	yes	1	1	318.288	248661	13	233	22	2355.1	10	84	168	4331	4449	2883	1049.58	19.8251	1891.17	114987	0.509979
[22]	NTFPs	provision	Madagascar	Protected	Africa	Directmarketpricing	revealed_preference	9875	Kramer1995	1995	4	-18.8578	48.4644	no	6	1	341.227	360656	51	350	20.6	2006.3	89	67	143	4533	4431	2488	802.617	20.6199	1980.77	114987	0.199466
[22]	water_regulation	regulative	Madagascar	Protected	Africa	Directmarketpricing	revealed_preference	9875	Kramer1995	1995	1	-19.0772	46.9575	no	6	12	80.077	2.37035e+06	51	179	24.5	1650.3	15	11	85	4277	3845	1989	1142.53	20.0886	1707.58	5333	0.524205
[23]	recreation	cultural	CostaRica	Protected	Americas	ContingentValuation	revealed_preference	10000	Tobias1991	1991	55	10.3072	-84.81	yes	0	1	185.049	7178.59	11	694	26.5	2035.7	82	137	278	6107	5273	2592	461.567	22.8527	3366.65	5333	0.0088657
[24]	recreation	cultural	CostaRica	Protected	Americas	TravelCost	stated_preference	6282	Shultz1998	1998	69.0165	9.80417	-84.1775	yes	0	1	236.072	1701.11	66	131	26.4	4742.3	34	144	221	6703	5850	2651	589.969	23.9592	2508.91	17170	8.52189
Reference
1. van Beukering PJH, Cesar HSJ, Janssen MA (2003) Economic valuation of the Leuser National Park on Sumatra, Indonesia. Ecological Economics 44: 43-62.
2. Rosales RMP, Kallesoe MF, Gerrard P, Muangchanh P, Phomtavong S, et al. (2005) Balancing the Returns to Catchment Management: The Economic Value of Conserving Natural Forests in Sekong, Lao PDR. . IUCN Water, Nature and Economics Technical Paper No 5.
3. Godoy R, Overman H, Demmer J, Apaza L, Byron E, et al. (2002) Local financial benefits of rain forests: comparative evidence from Amerindian societies in Bolivia and Honduras. Ecological Economics 40: 397-409.
4. Ammour T, Windevoxhel, N., Sencion, G. (2000) Economic valuation of mangrove ecosystems and subtropical forests in Central America. In: Guevara MDaR, editor. Sustainable Forest Management and Global Climate Change. Cheltenham: Edward Elgar. pp. 166-197.
5. Bann C (1997) An Economic Analysis of Tropical Forest Land Use Options: Ratanakiri Province, Cambodia. Singapore: Economy and Environment Program for Southeast Asia. Economy and Environment Program for Southeast Asia.
6. Curtis IA (2004) Valuing ecosystem goods and services: a new approach using a surrogate market and the combination of a multiple criteria analysis and a Delphi panel to assign weights to the attributes. Ecological Economics 50: 163-194.
7. Emerton L (1999) Mount Kenya: the economics of community conservation. : Institute for Development Policy and Management, University of Manchester.
8. Hodgson G, Dixon J (1988) Measuring economic losses due to sediment pollution: logging versus tourism and fisheries. Tropical Coastal Area Management: 5-8.
9. Naidoo R (2005) Economic benefits of biodiversity exceed costs of conservation at an African rainforest reserve. Proceedings of the National Academy of Sciences 102.
10. Echeverria J, Hanrahan M, Solorzano R (1995) Valuation of non-priced amenities provided by the biological resources whithin the Monteverde Cloud Forest preserve, Costa Rica. Ecological Economics 13: 43-52.
11. Edwards SF (1991) The demand for galapagos vacations: Estimation and application to wilderness preservation. Coastal Management 19: 155 - 169.
12. Godoy R, Lubowski R, Markandya A (1993) A method for the economic valuation of non-timber tropical forest products. Economic Botany 47: 220-233.
13. Kumari K (1996) Sustainable forest management: myth or reality? Exploring the prospects for Malaysia. Ambio 25: 459-467.
14. Pinedo-Vasquez M, Zarin D, Jipp P (1992) Economic returns from forest conversion in the Peruvian Amazon. Ecological Economics 6: 163-173.
15. Dixon JA, Hodgson G (1988) Economic evaluation of Coastal Resources: the El Niño study. . Tropical Coastal Area Management (August 1988): 5 -7.
16. Krutilla JV (1991) Environmental resource services of Malaysian moist tropical forest. Baltimore: Johns Hopkins University Press for Resources for the Future, Inc.
17. Naidoo R, Balmford A, Ferraro PJ, Polasky S, Ricketts TH, et al. (2006) Integrating economic costs into conservation planning. Trends in Ecology & Evolution 21: 681-687.
18. Grimes A, Loomis S, Jahnige P, Burnham M, Onthank K, et al. (1994) Valuing the Rain Forest: The Economic Value of Nontimber Forest Products in Ecuador. Ambio 23: 405-410.
19. Yaron G (2001) Forest, plantation crops or small-scale agriculture? An economic analysis of alternative land use options in the Mount Cameroun area. Journal of Environmental Planning and Management 44 85-108.
20. Ruitenbeek HJ (1992) The rainforest supply price: a tool for evaluating rainforest conservation expenditures. Ecological Economics 6: 57-78.
21. Priess JA, Mimler M, Klein AM, Schwarze S, Tscharntke T, et al. (2007) Linking deforestation scenarios to pollination services and economic returns in coffee agroforestry systems. Ecological Applications 17: 407-417.
22. Kramer R, Sharma, N and M.Munasinghe. (1995) Valuing Tropical Forests: Methodology and Case Study of Madagascar. Environment Paper No13, Washington DC: World Bank.
23. Tobias AH, Wood SE (1991) Valuing ecotourism in a tropical rainforest. Ambio 20: 91 -93.
24. Shultz S, Pinazzo J, Cifuentes M (1998) Opportunities and limitations of contingent valuation surveys to determine national park entrance fees: evidence from Costa Rica. Environment and Development Economics 3: 131-149.
25. Verma M (2000) Economic valuation of forests of Himachal Pradesh. Report on Economic Component of Himachal Pradesh Forestry Sector Review 7.
26. Regmi BN. Contribution of agroforestry for rural livelihoods: A case of Dhading District, Nepal; 2003. pp. 19-23.
27. Gundimeda H, Sanyal S, Sinha R, Sukhdev P (2006) The value of biodiversity in India’s forests. Green Accounting for Indian States Project: Monograph 4.
28. Mallawaarachchi T, Blamey R, Morrison M, Johnson A, Bennett J (2001) Community values for environmental protection in a cane farming catchment in Northern Australia: A choice modelling study. Journal of Environmental Management 62: 301-316.
29. Chomitz K, Kumari K (1996) The Domestic Benefits of Tropical Forests: a Critical Review, . Working paper 96-19, CSERGE, University of East Anglia and University College London.
30. Perrot-Maiître D, Davis P (2001) Case studies of markets and innovative financial mechanisms for water services from forests.
